# Supplementary material for: Antibiotikaverordnungen bei Atemwegsinfektionen im Kindesalter
Source: Springer Nature journal article supplement (doi:10.1007/s00103-020-03214-8), 2020-09-17
Supplement: MOESM1 [file 18389704]

**Bundesgesundheitsblatt 10/2020**

Elektronisches Zusatzmaterial zum Beitrag:

**Antibiotika-Verordnungen bei Atemwegsinfektionen im Kindesalter.  
Eine bundesweite Umfrage bei Fachärzten für Kinder- und Jugendmedizin  
sowie Allgemeinmedizin**

**Valentin Exner<sup>1</sup>, Christoph Höser<sup>2</sup>, Stefan Trapp<sup>3</sup>, Arne Simon<sup>4</sup>**

<sup>1</sup> Neurologisches Rehabilitationszentrum Godeshöhe, Bonn, Deutschland

<sup>2</sup> Institut für Hygiene und Öffentliche Gesundheit der Universität Bonn, GeoHealth centre, Bonn, Deutschland

<sup>3</sup> Praxis für Kinder- und Jugendmedizin, Berufsverband der Kinder- und Jugendärzte, Bremen, Deutschland

<sup>4</sup> Klinik für Pädiatrische Onkologie und Hämatologie, Universitätsklinikum des Saarlandes, Homburg/Saar, Deutschland

**Korrespondenzautor**

Prof. Dr. med. Arne Simon,  
Klinik für Pädiatrische Onkologie und Hämatologie  
Universitätsklinikum des Saarlandes  
Kirrberger Straße  
66421 Homburg/Saar  
arne.simon@uks.eu

Inhalt

**Fragebogen zur Umfrage der Deutschen Gesellschaft für pädiatrische Infektiologie (DGPI e.V.) und des Berufsverbands der Kinder- und Jugendärzte (BVKJ e.V.) zur Antibiotikatherapie von Atemwegsinfektionen bei Kindern und Jugendlichen**

## ANMELDUNG

|                                        |                                                                                                 |
|----------------------------------------|-------------------------------------------------------------------------------------------------|
| Name:                                  |                                                                                                 |
| Vorname:                               |                                                                                                 |
| Alter:                                 |                                                                                                 |
| Fachärztin / Facharzt                  | <input type="checkbox"/> Kinder- und Jugendmedizin<br><input type="checkbox"/> Allgemeinmedizin |
| Postleitzahl Praxis:                   |                                                                                                 |
| Niedergelassen seit wie vielen Jahren? |                                                                                                 |
| E-mail*:                               |                                                                                                 |

\* Nur für Rückfragen (wird streng vertraulich behandelt)

Bitte geben Sie uns eine Einschätzung, wie viele Kinder in Ihrer Praxis in den Wintermonaten (Oktober bis März) mit Atemwegsinfektionen\* pro Tag vorgestellt werden?

\*Infektion der oberen Luftwege, Pharyngitis, Tonsillitis, Sinusitis, akute Otitis media, Bronchitis, Bronchiolitis, Pneumonie

### Anzahl:

Bei welchen **Atemwegsinfektionen im Kindesalter** verschreiben Sie **wie oft** ein Antibiotikum?

#### **Akute Otitis media bei Kindern < 24 Monate:**

< 20%  20-40%  40-60%  > 60%

#### **Akute Otitis media bei Kindern > 24 Monate:**

< 20%  20-40%  40-60%  > 60%

#### **Tonsillopharyngitis:**

< 20%  20-40%  40-60%  > 60%

#### **Akute zervikale Lymphknotenschwellung mit Fieber:**

< 20%  20-40%  40-60%  > 60%

#### **Akute Bronchitis beim Schulkind:**

< 20%  20-40%  40-60%  > 60%

#### **Obstruktive Bronchitis beim Kleinkind:**

< 20%  20-40%  40-60%  > 60%

#### **Bronchiolitis beim Säugling:**

< 20%  20-40%  40-60%  > 60%

#### **Akute Sinusitis:**

< 20%  20-40%  40-60%  > 60%

**Asthma-Exazerbation (beim Schulkind) mit Infektionszeichen (z.B. Schnupfen, Fieber):**

< 20%  20-40%  40-60%  > 60%

Führen Sie bei einem Kind mit einer passenden Anamnese und einem klinischen Befund, der mit einer Tonsillopharyngitis durch  $\beta$ -hämolisierende Streptokokken der Serogruppe A (GAS) **vereinbar** ist, einen **Test** zum Nachweis des Erregers durch?

Ja  Strep A Schnelltest  
 Nein  Kultur

Nutzen Sie in Ihrer Praxis ein Point-of-Care Gerät zur Bestimmung des **C-reaktiven Proteins** (z.B. CrP aus einer kapillaren Blutprobe)?

Ja  
 Nein

Vorausgesetzt es gäbe für die Point-of-Care Bestimmung des CRP eine **kostendeckende Abrechnungsziffer**, hielten Sie es für hilfreich, wenn sie die Möglichkeit der CRP Bestimmung in Ihrer Praxis hätten?

Ja  
 Nein

Kleinkindern mit Atemwegsinfektionen werden in Deutschland häufig Antibiotika verschrieben, obwohl es sich oft um selbstlimitierende oder virale Infektionen handelt, die eigentlich keiner Antibiotikatherapie bedürfen.

**Warum** werden von niedergelassenen Ärztinnen/Ärzten (und im kinderärztlichen Notdienst der Kliniken) bei Kleinkindern mit Atemwegsinfektionen **so häufig Antibiotika** verordnet?

**Diagnostische Unsicherheit** (liegt eine bakterielle Infektion vor)?

Trifft zu  weiss nicht  Trifft nicht zu

**Verordnung „nur zur Sicherheit“** (fehlende Ressourcen für eine wiederholte Konsultation, unklar, ob die Eltern rechtzeitig wiederkommen)

Trifft zu  weiss nicht  Trifft nicht zu

**Befürchtung**, es könnte zu schwerwiegenden **Komplikationen** kommen (z.B. Mastoiditis bei AOM, Pneumonie nach akuter Bronchitis)

Trifft zu  weiss nicht  Trifft nicht zu

**Fehlende Kenntnis** von aktuellen Leitlinien der Fachgesellschaften (z.B. AWMF, DGPI)

Trifft zu  weiss nicht  Trifft nicht zu

Hoher **Erwartungsdruck der Eltern** in Richtung einer Antibiotikaverordnung

Trifft zu       weiss nicht       Trifft nicht zu

Bedenken, die Eltern könnten ohne eine Verordnung zu einem anderen **Arzt wechseln**

Trifft zu       weiss nicht       Trifft nicht zu

Welche **klinischen Zeichen** (und sonstige Gründe) sind für Sie **bei einem 5-jährigen, ansonsten gesunden Kind mit Bronchitis** (stabiler Allgemeinzustand, Tachypnoe ohne Dyspnoe, kein Sauerstoffbedarf, keine pneumonischen Rasselgeräusche bei der Auskultation) für Sie ausschlaggebend, eine **antibiotische Behandlung einzuleiten**?

Weiterhin **Husten nach mehr als 7 Tagen**

Trifft zu       weiss nicht       Trifft nicht zu

Grünliche **Verfärbung des Sekrets** aus den Atemwegen

Trifft zu       weiss nicht       Trifft nicht zu

**Fieber, das länger als 3 Tage** anhält

Trifft zu       weiss nicht       Trifft nicht zu

Sehr besorgte, unsichere **Eltern**

Trifft zu       weiss nicht       Trifft nicht zu

Eltern müssen dringend wieder zur **Arbeit**

Trifft zu       weiss nicht       Trifft nicht zu

Die Eltern berichten, beim letzten Mal habe das **Antibiotikum schnell geholfen**.

Trifft zu       weiss nicht       Trifft nicht zu

Nutzen Sie manchmal eine „**verzögerte Antibiotika-Verordnung**“ (die Eltern erhalten ein Rezept, das sie nur einlösen, falls es ihrem Kind nach 24-48h nicht besser oder schlechter geht)

Ja

Nein

Gibt es Ihrer Meinung nach einen Zusammenhang zwischen der **Verordnung von Antibiotika** durch niedergelassene Ärztinnen/Ärzte und der **Selektion resistenter, bakterieller Keime**?

Ja

Nein

Wie erklären Sie den Eltern den Zusammenhang zwischen **Antibiotikaverbrauch** und **Resistenz**, den **sinnvollen Einsatz** von Antibiotika und den **natürlichen Verlauf** von Atemwegsinfektionen?

Wenn ich kein Antibiotikum verordnen möchte, erkläre ich den Eltern, dass es sich nur um eine Virusinfektion handelt.

Trifft zu  Trifft nicht zu

Ich erkläre immer sehr ausführlich, warum ich ein Antibiotikum **gebe oder warum nicht**.

Trifft zu  Trifft nicht zu

Ich nutze **Informationsmaterial** (Handouts, Broschüren), um über **Nutzen** und **Risiken** einer Antibiotikatherapie zu informieren.

Trifft zu  Trifft nicht zu

Ich verzichte auf ausführliche Erklärungen und gebe den Eltern in der kurzen verbleibenden Zeit lieber nützliche Hinweise für die **symptomatische Behandlung**.

Trifft zu  Trifft nicht zu

Gern würde ich diesen Zusammenhang ausführlicher mit den Eltern besprechen, leider habe ich dazu jedoch im Praxisalltag **keine Zeit**.

Trifft zu  Trifft nicht zu

Sprechen Sie mit den Eltern über deren **Erwartungshaltung** in Hinblick auf eine Antibiotikaverordnung, auch wenn die Eltern sich hierzu nicht äußern?

Ja  
 Nein

Welche **Faktoren auf Seiten der Eltern** sind nach Ihrer Erfahrung mit Ausschlaggebend für eine „**fordernde**“ Haltung in Richtung einer Antibiotikaverordnung?

Akademische Schulbildung

Trifft zu  weiss nicht  Trifft nicht zu

Prekäre soziale Verhältnisse

(Familien mit geringem Bildungshintergrund Hartz IV Situation der Eltern usw.)

Trifft zu  weiss nicht  Trifft nicht zu

Migrationshintergrund

Trifft zu  weiss nicht  Trifft nicht zu

Engpässe bei der Kinderbetreuung zuhause

Trifft zu  weiss nicht  Trifft nicht zu

Welches **Antibiotikum** ist nach Ihrer Einschätzung/Erfahrung bei Kleinkindern (vor dem Schulalter) am besten geeignet zur Therapie fieberhaften Atemwegsinfektionen (z.B. Akute Otitis media, Sinusitis, ambulant zu behandelnde Pneumonie)?

- Penicillin
- Amoxicillin
- Amoxicillin plus Clavulansäure oder plus Sulbactam
- ein Cephalosporin, wie zum Beispiel Cefaclor oder Cefuroxim
- Erythromycin oder Clarithromycin
- Azithromycin

Wie hoch ist **der Anteil von  $\beta$ -hämolisierenden Streptokokken** der Serogruppe A (GAS) an allen Tonsillopharyngitiden im Kindesalter?

- < 20%
- 20-40%
- > 40%

Wie hoch ist nach Ihrer Einschätzung der Anteil von **Pneumokokken** in Deutschland, bei denen eine **Resistenz gegen Penicillin** vorliegt (invasive Isolate außer Meningitis)?

- < 5 %
- 6 – 10%
- 11 – 20%
- > 20%

Gibt es in Deutschland ein Problem mit **A-Streptokokken** ( $\beta$ -hämolisierende Streptokokken der Serogruppe A, GAS), die gegen **Penicillin resistent** sind?

- Ja
- Nein

Wenn Sie einem Kind mit **akuter Otitis media** ein Antibiotikum verordnen, **welchen Nutzen** erwarten Sie?

Die **Dauer der Schmerzen** wird reduziert (um wie viele Tage mit einem Antibiotikum?)

1 Tag       2 Tage       3 Tage       weiss nicht

**Dauer des Fiebers** wird reduziert (um wie viele Tage mit einem Antibiotikum?)

1 Tag       2 Tage       3 Tage       weiss nicht

Wie viele Patienten mit akuter Otitis media müssten Sie mit einem geeigneten Antibiotikum behandeln um **einen Fall einer Mastoiditis** zu verhindern?

50       500       5.000       10.000       weiss nicht

Wie viele Patienten mit **Tonsillopharyngitis** müssten Sie mit einem geeigneten Antibiotikum behandeln um einen Fall eines **Peritonsillarabszesses** zu verhindern?

50       500       5.000       10.000       weiss nicht
